1 **Title**

2 Secular Trends in Airway Management of Out-of-Hospital Cardiac Arrest in the National  
3 EMS Information System (NEMSIS) Dataset

4

5 **Author names and affiliations**

6 *Christopher B. Gage<sup>a,b</sup>, Jonathan R. Powell<sup>a,b</sup>, Michelle Nassaf<sup>c</sup>, Henry Wang<sup>c</sup>, Ashish*  
7 *R. Panchal<sup>a,b,c</sup>.*

8 *<sup>a</sup>National Registry of Emergency Medical Technicians, Columbus, Ohio; <sup>b</sup>Division of*  
9 *Epidemiology, The Ohio State University College of Public Health, Columbus, Ohio;*

10 *<sup>c</sup>Department of Emergency Medicine, The Ohio State University Wexner Medical*  
11 *Center, Columbus, Ohio.*

12

13 **Corresponding author**

14 Ashish R. Panchal

15 The National Registry of EMTs

16 6610 Busch Blvd, Columbus, OH 43229

17 Email: [apanchal@nremt.org](mailto:apanchal@nremt.org)

18 **Abstract**

19 **Introduction:** Advanced airway management is essential in resuscitation from out-of-  
20 hospital cardiac arrest (OHCA). No longitudinal national studies have described  
21 longitudinal trends in airway device choice. We sought to evaluate secular trends of  
22 OHCA endotracheal intubation (ETI) and supraglottic airway (SGA) in the United States  
23 (US).

24 **Methods:** We evaluated ETI and SGA use for 2013-2022 in adult OHCA in the US  
25 using the National EMS Information System (NEMIS) database. We identified OHCA  
26 events (CPR performed or defibrillation) and evaluated the proportions of ETI and SGA  
27 used during OHCA. We repeated the results stratified by urbanicity. We used  
28 descriptive statistics to describe incidence prevalence with nonparametric trend testing  
29 for proportional changes over time and a two-sample stochastic rank sum test for  
30 equivalence to evaluate airway use differences by urbanicity.

31 **Results:** During the study period, we observed 320,154,097 adult 9-1-1 events. Of  
32 3,118,703 OHCA, there were 699,568 and 337,458 cases with reported ETI and SGA  
33 attempts. The dominant airway choice was ETI, though the trend of ETI choice  
34 decreased as SGA increased over time (p-trend <0.05). From 2013 to 2022, SGA use  
35 increased in urban settings while rural and suburban remained stable (urban 27% to  
36 39%\*; suburban 31% to 29%; rural 28% to 29%, respectively, \*p<0.05).

37 **Conclusion:** Over ten years, rates of advanced airway use have increased, with ETI  
38 remaining the predominant airway for adults in OHCA. Interestingly, ETI choice  
39 decreased as SGA increased over the study period. SGA use distinctly differed in urban

40 settings, increasing concerns for disparities in care provision among communities. With  
41 the increased use of SGA over time, further evaluation of patient outcomes is required  
42 in datasets with robust linkage to Utstein variables.

43

44 **Keywords:** Emergency medical service, Airway management, Out-of-hospital cardiac  
45 arrests, Laryngeal mask airway, Endotracheal intubation, Supraglottic airway device

46

47 **Abbreviations:** CPR, cardiopulmonary resuscitation; BVM, bag valve mask; EMS,  
48 emergency medical services; ETI, endotracheal intubation; ICD, International  
49 Classification of Diseases; IRB, international research board; NEMSIS, National  
50 Emergency Medical Services Information System; OHCA, out of hospital cardiac arrest;  
51 ROSC, return of spontaneous circulation; SGA, supraglottic airway; SNOMED,  
52 systematized nomenclature of medicine.

## 53 Introduction

54           Approximately 350,000 people annually experience out-of-hospital cardiac arrest  
55 (OHCA), of which only 15% survive.<sup>1</sup> Survival from OHCA depends on factors like  
56 bystander CPR, early defibrillation, and effective airway management. Prehospital  
57 airway management in OHCA care is essential, allowing for effective ventilation and  
58 optimizing resuscitation during cardiac arrest.<sup>2 3</sup> Prehospital clinicians perform airway  
59 management through differing combinations of non-invasive and invasive techniques,  
60 including bag-valve mask-only (BVM), supraglottic airway devices (SGA), and  
61 endotracheal intubation (ETI).

62           For decades ETI was the dominant advanced airway approach for OHCA.  
63 However, recent studies have promoted the utility of SGA in OHCA. Recent randomized  
64 control trial (RCT) data demonstrated that 72-hour survival, return of spontaneous  
65 circulation, hospital survival, and favorable neurological status at discharge are higher  
66 for SGA than ETI.<sup>4</sup> SGA was more likely to have higher overall success rates, fewer first  
67 attempts, and fewer complications (e.g., unrecognized airway misplacement and  
68 inadequate ventilation) than ETI.<sup>4</sup> Another RCT found that SGA was significantly more  
69 successful in achieving ventilation after up to 2 attempts, especially when SGA was  
70 placed before an ETI attempt.<sup>5</sup> Even with the data described, the overall picture of  
71 airway management research in OHCA is limited.<sup>6</sup>

72           No national longitudinal study has evaluated whether the choice of advanced  
73 airway management between SGA and ETI in OHCA has changed. We sought to  
74 assess whether the proportions of these advanced airway devices have changed in  
75 OHCA patients over the last decade.

76

## 77 **Methods**

### 78 *Study Design and Population*

79 This retrospective study assessed airway device use in OHCA patients from the  
80 National Emergency Medical Services Information System (NEMSIS) dataset from 2013  
81 to 2022. The American Institutes of Research Institutional Review Board approved the  
82 study.

83 The National Emergency Medical Services Information System (NEMSIS) is the  
84 national data standard for emergency medical services (EMS) in the United States. It  
85 was developed by the National Association of State EMS Directors and the National  
86 Highway Traffic Safety Administration in 1996. NEMSIS is designed to improve the  
87 quality and efficiency of EMS by providing a common language for exchanging data  
88 between EMS agencies and organizations and is used for various purposes, including  
89 quality improvement, research, and policy development.<sup>7</sup> NEMSIS versions include  
90 Version 1 from 1996-2009, Version 2 from 2010-2016, and its current Version 3 starting  
91 in 2017.

92

### 93 *Selection of Subjects and Identification of Cases*

94 We included NEMSIS 911 events for adults  $\geq 18$  years. Using similar methods  
95 developed by Chan et al. for the NEMSIS data set, we identified OHCA episodes using  
96 four constructs: 1) performance of CPR, 2) provision of CPR before or after EMS arrival,  
97 3) chest compressions procedure, and 4) defibrillator or cardioversion procedure.<sup>8</sup>

98 Because NEMESIS cannot distinguish persons among the recorded events, we assumed  
99 each event represented a separate patient.

100 In 2017, NEMESIS implemented a transition from Version 2 to the Version 3 data  
101 standard. A salient update in Version 3 was the addition of the International  
102 Classification of Diseases (ICD) codes, ICD-9 and 10, now the coding standard for  
103 electronic healthcare records.<sup>9</sup> Since this longitudinal analysis bridged the transition  
104 between data set versions, we used the NEMESIS crosswalk corresponding variable  
105 changes between the Versions 2 and 3 data sets.<sup>10</sup> This crosswalk allows users to  
106 understand updates between variable identifiers from data dictionary 2.2.1 to 3.4.0, but  
107 unfortunately, it lists only data elements from Version 2 that remain in Version 3.  
108 Therefore, in addition to the crosswalk, we used Diggs 2014 and Wang 2011 for Version  
109 2 (Appendix 1) and SNOMED CT Browser and Hanlin 2022 for Version 3 (Appendix 2)  
110 to categorize the different airway devices used in our OHCA population.<sup>11-14</sup> The  
111 extracted variables for the different NEMESIS versions are noted in Appendix 1 (Version  
112 2) and Appendix 2 (Version 3).

113

#### 114 *Outcomes*

115 The primary outcomes were the adult OHCA proportions receiving SGA or ETI.  
116 (Appendix 2) We did not include bag-value mask (BVM) ventilation because of  
117 inconsistent reporting in the NEMESIS data set. In addition, we did not include surgical  
118 airways because of their uncommon use in the OHCA.

119

120 *Measures*

121           Demographic characteristics related to the analysis included age (year), gender  
122 (designated as male or female), and race (defined as White, Black or African American,  
123 Asian, American Indian or Alaska Native, Native Hawaiian or Other Pacific Island, or  
124 Other). Ethnicity was reported with race in Version 2 but separately in Version 3  
125 (Hispanic/Latino and Not Hispanic/Latino). There were 246 ICD-10 codes for incident  
126 locations in NEMSIS (Appendix 3). These codes were categorized into  
127 Home/Residence, Healthcare Facility, Non-Healthcare Business, Street or Highway,  
128 and Other (e.g., sporting event, outdoors). Due to differences between versions, all  
129 variable codes are listed in their respective demographic tables.

130           The NEMSIS Project classified population setting (urbanicity) using the United  
131 States Department of Agriculture (USDA) and Office of Management and Budget (OMB)  
132 definitions: Urban (Urban Influence Codes 1, 2), counties with large (1+ million  
133 residents) or small (less than 1 million residents) metropolitan areas; Suburban (Urban  
134 Influence Codes 3 and 5), micropolitan (with an urban core of at least 10,000 residents)  
135 counties adjacent to a large or small metropolitan county; Rural (Urban Influence Codes  
136 4, 6, 8, 9), non-urban core counties neighboring a large metropolitan area or a small  
137 metropolitan area (with or without a town); Wilderness (Urban Influence Codes 7, 10,  
138 11, 12), non-core counties that are adjacent to micropolitan counties (with or without  
139 own town).<sup>12,15</sup> We used these classifications to evaluate airway proportions by  
140 urbanicity. Due to low population numbers, Wilderness populations were combined with  
141 Rural populations.<sup>16</sup>

142

## 143 *Statistical Analysis*

144 We determined the annual incidence of each airway (ETI and SGA) and tested  
145 trends over time using a non-parametric test.<sup>17</sup> We calculated the yearly advanced  
146 airway incidence rate by dividing the number of SGA by the total number of SGA plus  
147 ETI and the number of ETI divided by the total number of SGA plus ETI. We further  
148 stratified the analysis by urbanicity and used a two-sample stochastic rank sum test  
149 (TOST) for equivalence to assess for significant differences in SGA attempts among  
150 urbanicity between the years 2013 and 2022.<sup>18</sup> Additionally, we evaluated the annual  
151 trend for the number of advanced airway devices per OHCA event. Descriptive statistics  
152 of population demographics were calculated. All analyses were conducted with Stata  
153 17/Standard Edition.<sup>19</sup>

154

## 155 **Results**

156 In the study period, there were 320,154,097 EMS activations reported in the  
157 NEMSIS data over the ten years, with 3,118,703 identified as adults suffering from  
158 OHCA (Figure 1). An average of 1.0% annually met the OHCA inclusion criteria in  
159 Version 2 and 0.92% in Version 3 (Table 1). The median age was similar over the study  
160 period, with males the most common gender (59.3%). There was a high amount of  
161 missingness for race (34.9%). OHCA events were more common in Urban (83.4%) and  
162 Home/Residential settings (65.2%) (Table 2).

163 Over the last decade, the predominant airway approach used was ETI, and the  
164 percentage of advanced airways performed per OHCA events increased (Table 3). The  
165 proportional trend was significant ( $p$ -value  $<0.001$ ) for SGA use increasing while the



166 trend for ETI decreased (Figure 2). Specifically, ETI use appeared to decline over the  
167 last three years, with a subsequent increase in SGA use. When evaluated based on  
168 urbanicity (Figure 3), this trend was still true and appeared more focused in urban areas  
169 (e.g., decreased ETI use in urban areas with an associated increase in SGA).

170

## 171 **Discussion**

172 While advanced airway usage has increased in adult OHCA events, ETI usage  
173 has decreased and been replaced with SGA (Figure 2). This trend was more dramatic in  
174 urban areas compared to suburban or rural settings (Figure 3). Many factors can impact  
175 these choices including which level of EMS clinician arrives on the scene first, the local  
176 and state protocols, and patient position and location.<sup>20</sup> Additionally, factors such as  
177 patient improvement, transportation time to the hospital, and the number of assisting  
178 responders, play a role in whether the initial device is maintained or if one switches to  
179 another.

180 Multiple RCTs have evaluated the impact of SGA first as a management strategy  
181 for OHCA, with one study demonstrating no difference in outcomes compared to ETI,  
182 while another demonstrated improved outcomes utilizing SGA.<sup>4,5</sup> Complications with ETI  
183 placement during OHCA often involve interruptions in chest compressions to allow for  
184 better vocal cord visualization that may lead to worsened return of spontaneous  
185 circulation (ROSC), and neurological outcomes.<sup>21,22</sup> Although there have been many  
186 advances around ETI, including gum elastic bougies and video laryngoscopy, concerns  
187 around reduced airway opportunities and lack of training may lead many EMS clinicians

188 to choose the least invasive approach to airway management. Based on these and  
189 other evaluations, the 2020 American Heart Association (AHA) advanced cardiac life  
190 support (ACLS) guidelines recommend that ETI or SGA be used as primary advanced  
191 airway strategies for OHCA if ETI placement success rates are high.<sup>23</sup> In situations  
192 where ETI placement success rates were low, the recommendation was to place SGA  
193 devices due to the higher first-pass success.

194 Our study demonstrates that over the last decade, SGA has been adopted by  
195 EMS clinicians as a valid advanced airway strategy. When SGA and ETI proportions are  
196 stratified by urbanicity (Figure 3), the degree of trend between ETI and SGA in urban  
197 settings differs in non-urban areas. The differences between urban and rural settings  
198 are noteworthy and could be multifactorial. First, urban and rural communities are  
199 different clinical practice settings. OHCA patients in non-urban regions tend to be in  
200 homes, have extended downtimes, and are unwitnessed.<sup>24</sup> Rural areas tend to have  
201 more volunteer EMS clinicians, longer response and transport times, and sicker  
202 patients.<sup>25</sup> Secondly, medical direction and knowledge dissemination practices may  
203 differ with urban areas having medical directors from larger, university-based medical  
204 centers that are more proactive in spreading current evidence-based knowledge.<sup>25</sup>  
205 Differences in airway choice could be a factor leading to urban settings experiencing  
206 greater OHCA survival than those in non-urban settings, but a direct impact on patient  
207 outcomes is yet to be determined.<sup>26</sup>

208 Understanding the trends in airway management by urbanicity is a significant  
209 step in better understanding disparities in care throughout US communities. Linking  
210 airway device choice with Utstein variables would help determined the direct impact

211 these decisions have on patient outcomes. Even without this type of robust evaluation,  
212 medical directors should consider enhancing dissemination and training strategies,  
213 especially in non-urban areas, to ensure high-level patient outcomes.

214

## 215 **Limitations**

216 First, being a longitudinal study, one of the challenges encountered was the need  
217 to crosswalk the variables for OHCA and advanced airway devices from NEMESIS  
218 Version 2 (2013-2016) to Version 3 (2017-2022). Since Version 3 started incorporating  
219 the International Classification of Diseases (ICD) 10 codes and featured many new  
220 variables, a true crosswalk for these was unavailable. To combat this problem, we first  
221 leveraged the data dictionary, followed by searching for ICD-10 codes, and used  
222 previous evaluations to understand the differences in the variables (Appendices 1-3).  
223 Second, we limited our evaluation to nationally required variables due to data reporting  
224 and could not evaluate cardiac arrest Utstein variables and their association with airway  
225 device usage (e.g., shockable vs. non-shockable rhythm and witnessed). Third, race is  
226 difficult to quantify in NEMESIS due to a large amount of missing or misclassification.  
227 Additionally, ethnicity was combined into a unified race variable in version 3 making a  
228 true crosswalk difficult (Table 3). Finally, all data entry was performed by EMS clinicians  
229 with the possibility of reporting bias.

230

## 231 **Conclusion**

232 Over ten years, rates of advanced airway use have increased, with ETI  
233 remaining the predominant airway for adults in OHCA. Interestingly, SGA use distinctly  
234 differed in urban settings, increasing concerns for disparities in care provision among  
235 communities. With the increased use of SGA over time, further evaluation of patient  
236 outcomes is required in datasets with robust linkage to Utstein variables.

237

### 238 **Conflict of interest statement**

239 The authors declare no financial or other conflicts of interest.

240

### 241 ***Acknowledgments***

242 We want to thank the NEMSIS Technical Assistance Center for their work in  
243 helping us access this data.

244

### 245 **Funding**

246 This research received no specific grant from funding agencies in the public,  
247 commercial, or not-for-profit sectors.

248

249

250

## 251 **References**

- 252 1. Tsao CW, Aday AW, Almarzooq ZI, et al. Heart Disease and Stroke Statistics—  
253 2022 Update: A Report From the American Heart Association. *Circulation*  
254 2022;145(8). DOI: 10.1161/cir.0000000000001052.
- 255 2. Editorial Board. *Circulation* 2020;142(16\_suppl\_2):S336-S336. DOI:  
256 doi:10.1161/CIR.0000000000000929.
- 257 3. Kitamura T, Kiyohara K, Sakai T, et al. Epidemiology and outcome of adult out-  
258 of-hospital cardiac arrest of non-cardiac origin in Osaka: a population-based  
259 study. *BMJ Open* 2014;4(12):e006462. DOI: 10.1136/bmjopen-2014-006462.
- 260 4. Wang HE, Schmicker RH, Daya MR, et al. Effect of a Strategy of Initial Laryngeal  
261 Tube Insertion vs Endotracheal Intubation on 72-Hour Survival in Adults With  
262 Out-of-Hospital Cardiac Arrest: A Randomized Clinical Trial. *JAMA*  
263 2018;320(8):769-778. DOI: 10.1001/jama.2018.7044.
- 264 5. Benger JR, Kirby K, Black S, et al. Effect of a Strategy of a Supraglottic Airway  
265 Device vs Tracheal Intubation During Out-of-Hospital Cardiac Arrest on  
266 Functional Outcome: The AIRWAYS-2 Randomized Clinical Trial. *Jama*  
267 2018;320(8):779-791. (In eng). DOI: 10.1001/jama.2018.11597.
- 268 6. Agency for Healthcare Research and Quality (AHRQ). Guidelines and Measures  
269 Updates. September 2018 (<https://www.ahrq.gov/gam/updates/index.html>).
- 270 7. National EMS Information System (NEMESIS). What is NEMESIS.  
271 (<https://nemsis.org/what-is-nemsis/>).
- 272 8. Chan HK, Okubo M, Callaway CW, Mann NC, Wang HE. Characteristics of adult  
273 out-of-hospital cardiac arrest in the National Emergency Medical Services

- 274 Information System. Journal of the American College of Emergency Physicians  
275 Open 2020;1(4):445-452. DOI: 10.1002/emp2.12106.
- 276 9. National Center for Health Statistics. International Classification of Diseases,  
277 (ICD-10-CM/PCS) Transition – Background.  
278 ([https://www.cdc.gov/nchs/icd/icd10cm\\_pcs\\_background.htm#:~:text=CM%2FPCS  
279 S%20Transition-  
280 .International%20Classification%20of%20Diseases%2C%20\(ICD%2D10%2DCM  
281 %2F,Print\).](https://www.cdc.gov/nchs/icd/icd10cm_pcs_background.htm#:~:text=CM%2FPCS%20Transition-International%20Classification%20of%20Diseases%2C%20(ICD%2D10%2DCM%2F,Print).))
- 282 10. National EMS Information System (NEMSIS). NEMSIS Version 2 to Version 3  
283 Translation. ([https://nemsis.org/media/nemsis\\_v3/release-  
284 3.4.0/Translation/v2v3Translation/v2v3Translation/NEMSIS\\_V2\\_V3\\_Translation  
285 Data\\_Dictionary.pdf](https://nemsis.org/media/nemsis_v3/release-3.4.0/Translation/v2v3Translation/v2v3Translation/NEMSIS_V2_V3_Translation_Data_Dictionary.pdf)).
- 286 11. Diggs LA, Yusuf JE, De Leo G. An update on out-of-hospital airway management  
287 practices in the United States. Resuscitation 2014;85(7):885-92. (In eng). DOI:  
288 10.1016/j.resuscitation.2014.02.032.
- 289 12. Wang HE, Mann NC, Mears G, Jacobson K, Yealy DM. Out-of-hospital airway  
290 management in the United States. Resuscitation 2011;82(4):378-85. (In eng).  
291 DOI: 10.1016/j.resuscitation.2010.12.014.
- 292 13. International SNOMED CT. SNOMED CT Browser.  
293 (<https://browser.ihtsdotools.org/multi-extension-search.html>).
- 294 14. Hanlin ER, Chan HK, Hansen M, et al. Epidemiology of out-of-hospital pediatric  
295 airway management in the 2019 national emergency medical services

- 296 information system data set. Resuscitation 2022;173:124-133. (In eng). DOI:  
297 10.1016/j.resuscitation.2022.01.008.
- 298 15. US Department of Agriculture. Urban Influence Codes.  
299 (<https://www.ers.usda.gov/data-products/urban-influence-codes/>).
- 300 16. Peters GA, Ordoobadi AJ, Panchal AR, Cash RE. Differences in Out-of-Hospital  
301 Cardiac Arrest Management and Outcomes across Urban, Suburban, and Rural  
302 Settings. Prehosp Emerg Care 2022;1-8. (In eng). DOI:  
303 10.1080/10903127.2021.2018076.
- 304 17. Cuzick J. A Wilcoxon-type test for trend. Stat Med 1985;4(1):87-90. (In eng).  
305 DOI: 10.1002/sim.4780040112.
- 306 18. Lakens D. Equivalence Tests: A Practical Primer for t Tests, Correlations, and  
307 Meta-Analyses. Soc Psychol Personal Sci 2017;8(4):355-362. (In eng). DOI:  
308 10.1177/1948550617697177.
- 309 19. Stata. Stata. (<https://www.stata.com/>).
- 310 20. National Association of State EMS Officials. National EMS Scope of Practice  
311 Model 2019 (Report No. DOT HS 812-666). National Highway Traffic Safety  
312 Administration.  
313 ([https://www.ems.gov/pdf/National EMS Scope of Practice Model 2019.pdf](https://www.ems.gov/pdf/National_EMS_Scope_of_Practice_Model_2019.pdf)).
- 314 21. Grunau B, Kime N, Leroux B, et al. Association of Intra-arrest Transport vs  
315 Continued On-Scene Resuscitation With Survival to Hospital Discharge Among  
316 Patients With Out-of-Hospital Cardiac Arrest. JAMA 2020;324(11):1058-1067.  
317 DOI: 10.1001/jama.2020.14185.

- 318 22. Buick JE, Drennan IR, Scales DC, et al. Improving Temporal Trends in Survival  
319 and Neurological Outcomes After Out-of-Hospital Cardiac Arrest. *Circ*  
320 *Cardiovasc Qual Outcomes* 2018;11(1):e003561. (In eng). DOI:  
321 10.1161/circoutcomes.117.003561.
- 322 23. Panchal AR, Bartos JA, Cabañas JG, et al. Part 3: Adult Basic and Advanced  
323 Life Support: 2020 American Heart Association Guidelines for Cardiopulmonary  
324 Resuscitation and Emergency Cardiovascular Care. *Circulation*  
325 2020;142(16\_suppl\_2):S366-s468. (In eng). DOI:  
326 10.1161/cir.0000000000000916.
- 327 24. Peters GA, Ordoobadi AJ, Panchal AR, Cash RE. Differences in Out-of-Hospital  
328 Cardiac Arrest Management and Outcomes across Urban, Suburban, and Rural  
329 Settings. *Prehosp Emerg Care* 2023;27(2):162-169. (In eng). DOI:  
330 10.1080/10903127.2021.2018076.
- 331 25. King NP, Marcus; Huling, Sarah; Hanson, Brian EMS Services in Rural America:  
332 Challenges and Opportunities. National Rural Health Association: May 11, 2018  
333 2018.  
334 ([https://www.ruralhealth.us/NRHA/media/Emerge\\_NRHA/Advocacy/Policy%20do](https://www.ruralhealth.us/NRHA/media/Emerge_NRHA/Advocacy/Policy%20documents/05-11-18-NRHA-Policy-EMS.pdf)  
335 [cuments/05-11-18-NRHA-Policy-EMS.pdf](https://www.ruralhealth.us/NRHA/media/Emerge_NRHA/Advocacy/Policy%20documents/05-11-18-NRHA-Policy-EMS.pdf)).
- 336 26. Kragholm K, Hansen CM, Dupre ME, et al. Care and outcomes of urban and  
337 non-urban out-of-hospital cardiac arrest patients during the HeartRescue Project  
338 in Washington state and North Carolina. *Resuscitation* 2020;152:5-15. (In eng).  
339 DOI: 10.1016/j.resuscitation.2020.04.030.
- 340



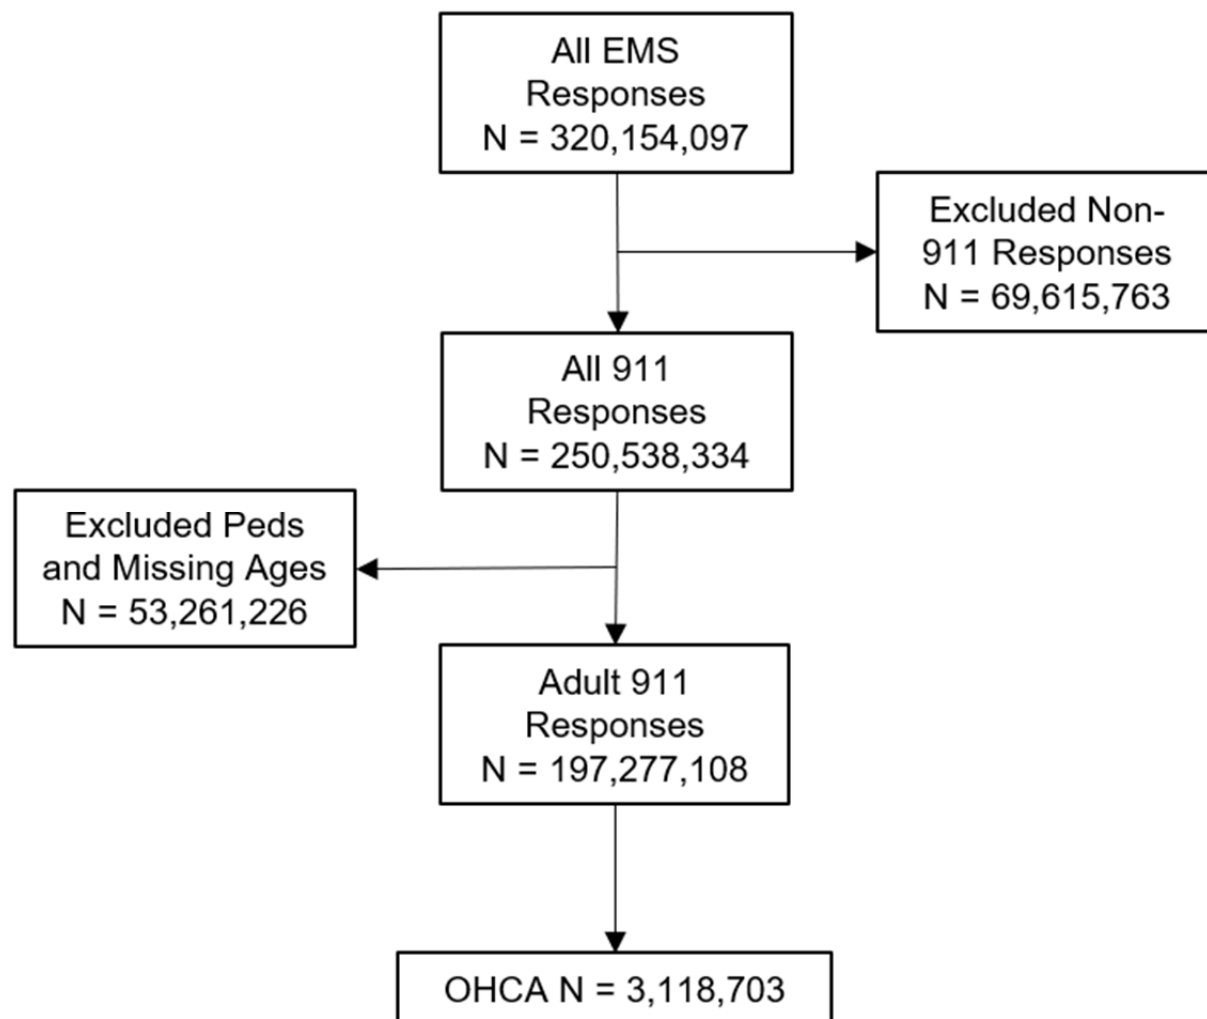

341  
342 **Figure 1:** Study Design with Inclusion and Exclusion Criteria. Abbreviations: EMS –  
343 emergency medical services, OHCA – out-of-hospital cardiac arrest, Peds – pediatrics.

344 **Table 1:** Yearly proportions for inclusions, exclusions, and percentage for OHCA / All NEMSIS Calls. Abbreviations: CI –  
 345 confidence interval, NEMSIS – national emergency medical services information system, OHCA – out-of-hospital cardiac  
 346 arrest, Peds – pediatrics. Version 2: 2013-2016, Version 3: 2017-2022.

|                               | 2013             | 2014             | 2015             | 2016             | 2017             | 2018             | 2019             | 2020             | 2021             | 2022             |
|-------------------------------|------------------|------------------|------------------|------------------|------------------|------------------|------------------|------------------|------------------|------------------|
| All NEMSIS Calls              | 23,897,211       | 25,835,729       | 30,206,450       | 29,919,652       | 7,907,829        | 22,532,890       | 34,203,087       | 43,488,767       | 48,982,990       | 53,179,492       |
| Exclude Non-911 Events        | 5,341,048        | 5,623,484        | 6,689,361        | 6,250,969        | 1,562,727        | 4,690,575        | 7,701,119        | 9,694,880        | 10,879,838       | 11,181,762       |
| 911 Responses                 | 18,556,163       | 20,212,245       | 23,517,089       | 23,668,683       | 6,345,102        | 17,842,315       | 26,501,968       | 33,793,887       | 38,103,152       | 41,997,730       |
| Exclude Peds and Missing      | 3,814,650        | 4,096,026        | 4,805,988        | 4,988,810        | 1,272,537        | 3,995,932        | 5,762,803        | 7,182,452        | 8,191,589        | 9,150,439        |
| Adults and 911 Calls Only     | 14,741,513       | 16,116,219       | 18,711,101       | 18,679,873       | 5,072,565        | 13,846,383       | 20,739,165       | 26,611,435       | 29,911,563       | 32,847,291       |
| Adults and 911 Calls Only (%) | 61.69%           | 62.38%           | 61.94%           | 62.43%           | 64.15%           | 61.45%           | 60.64%           | 61.19%           | 61.07%           | 61.77%           |
| OHCA Events                   | 267,999          | 258,961          | 287,712          | 328,745          | 68,745           | 197,933          | 287,028          | 437,284          | 481,142          | 503,154          |
| OHCA Events % (CI 95%)        | 1.12 (1.12-1.13) | 1.00 (1.00-1.01) | 0.95 (0.95-0.96) | 1.10 (1.10-1.10) | 0.87 (0.87-0.88) | 0.88 (0.87-0.88) | 0.84 (0.84-0.84) | 1.01 (1.00-1.01) | 0.98 (0.98-0.99) | 0.95 (0.94-0.95) |

347 Some variables between Versions 2 and 3 differ, and introversion comparisons should be performed cautiously.

348

349



|                                         |                |                |                |                |               |                |                |                |                |                |
|-----------------------------------------|----------------|----------------|----------------|----------------|---------------|----------------|----------------|----------------|----------------|----------------|
| Home/Residence                          | 162,780 (65.0) | 158,240 (65.5) | 178,158 (66.9) | 193,663 (65.3) | 33,661 (63.2) | 107,787 (65.4) | 162,255 (66.3) | 230,434 (67.1) | 247,329 (66.1) | 257,292 (68.8) |
| Healthcare Facility                     | 49,371 (19.7)  | 45,384 (18.8)  | 46,727 (17.6)  | 52,968 (17.9)  | 7,488 (14.1)  | 21,000 (12.7)  | 31,270 (12.8)  | 47,672 (13.9)  | 49,206 (13.1)  | 53,982 (14.2)  |
| Non-Healthcare Business                 | 16,681 (6.7)   | 14,951 (6.2)   | 16,010 (6.0)   | 21,443 (7.2)   | 5,039 (9.5)   | 16,102 (9.8)   | 21,336 (8.7)   | 27,011 (7.9)   | 32,771 (8.8)   | 36,189 (9.7)   |
| Street or Highway                       | 19,095 (7.6)   | 18,602 (7.7)   | 22,235 (8.4)   | 25,090 (8.5)   | 4,398 (8.3)   | 13,650 (8.3)   | 19,994 (8.2)   | 26,977 (7.9)   | 31,690 (8.5)   | 33,683 (9.0)   |
| Other (e.g., sporting events, outdoors) | 2,486 (1.0)    | 4,458 (1.8)    | 3,006 (1.1)    | 3,190 (1.1)    | 2,663 (5.0)   | 6,254 (3.8)    | 9,990 (4.1)    | 11,290 (3.3)   | 13,203 (3.5)   | 13,112 (3.5)   |
| Missing                                 | 17,586         | 17,326         | 21,576         | 32,391         | 15,380        | 32,877         | 41,504         | 92,631         | 102,121        | 106,989        |

352 The variables for incident location are defined in Version 2 and the International Classification of Diseases-10 codes in

353 Version 3 and cannot be compared between versions. --- These variables are not available in NEMESIS Version 3 data. No

354 percentages were used for Ethnicity since Version 3 was not reported consistently as in Version 2.

355

356

357

358 **Figure 2:** Advanced airway proportions per OHCA patient over ten years. Abbreviations: OHCA – out-of-hospital cardiac

359 arrest.

360

361

362 **Figure 3:** Percent of SGA and ETI use per total advanced airway events for OHCA over ten years. Abbreviations: ETI –

363 endotracheal intubation, OHCA – out-of-hospital cardiac arrest, SGA – supraglottic airway.

364

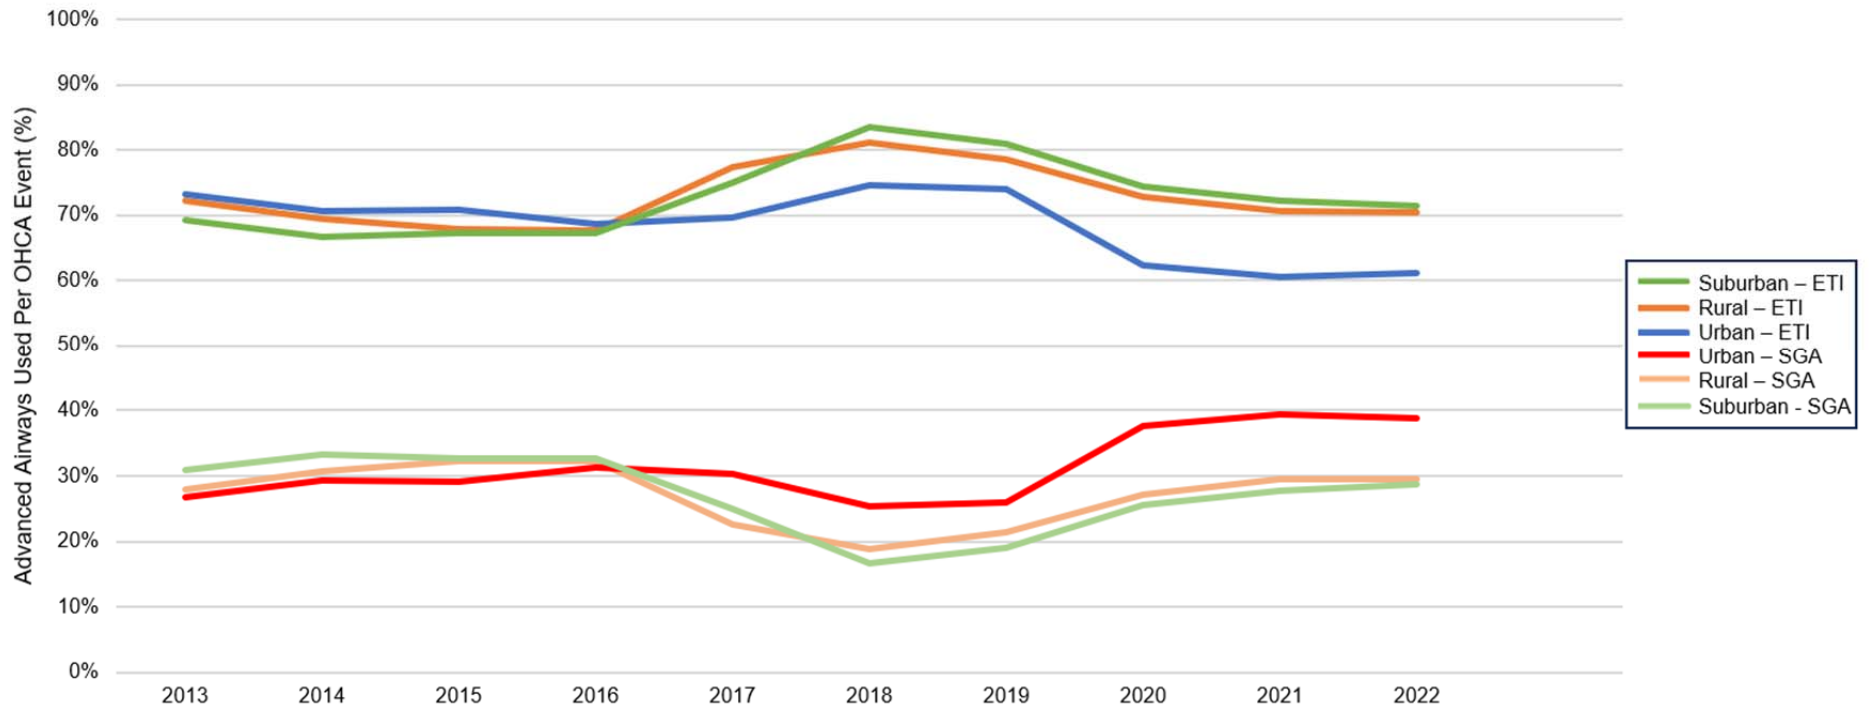

365

366 **Figure 4:** Overall SGA or ETI attempts for OHCA by urbanicity. Abbreviations: ETI – endotracheal intubation, OHCA –

367 out-of-hospital cardiac arrest, SGA – supraglottic airway.

368

369



**Figure 1:** Study Design with Inclusion and Exclusion Criteria. Abbreviations: EMS – emergency medical services, OHCA – out-of-hospital cardiac arrest, Peds – pediatrics.



**Table 1:** Yearly proportions for inclusions, exclusions, and percentage for OHCA / All NEMSIS Calls. Abbreviations: CI – confidence interval, NEMSIS – national emergency medical services information system, OHCA – out-of-hospital cardiac arrest, Peds – pediatrics. Version 2: 2013-2016, Version 3: 2017-2022.

|                               | 2013             | 2014             | 2015             | 2016             | 2017             | 2018             | 2019             | 2020             | 2021             | 2022             |
|-------------------------------|------------------|------------------|------------------|------------------|------------------|------------------|------------------|------------------|------------------|------------------|
| All NEMSIS Calls              | 23,897,211       | 25,835,729       | 30,206,450       | 29,919,652       | 7,907,829        | 22,532,890       | 34,203,087       | 43,488,767       | 48,982,990       | 53,179,492       |
| Exclude Non-911 Events        | 5,341,048        | 5,623,484        | 6,689,361        | 6,250,969        | 1,562,727        | 4,690,575        | 7,701,119        | 9,694,880        | 10,879,838       | 11,181,762       |
| 911 Responses                 | 18,556,163       | 20,212,245       | 23,517,089       | 23,668,683       | 6,345,102        | 17,842,315       | 26,501,968       | 33,793,887       | 38,103,152       | 41,997,730       |
| Exclude Peds and Missing      | 3,814,650        | 4,096,026        | 4,805,988        | 4,988,810        | 1,272,537        | 3,995,932        | 5,762,803        | 7,182,452        | 8,191,589        | 9,150,439        |
| Adults and 911 Calls Only     | 14,741,513       | 16,116,219       | 18,711,101       | 18,679,873       | 5,072,565        | 13,846,383       | 20,739,165       | 26,611,435       | 29,911,563       | 32,847,291       |
| Adults and 911 Calls Only (%) | 61.69%           | 62.38%           | 61.94%           | 62.43%           | 64.15%           | 61.45%           | 60.64%           | 61.19%           | 61.07%           | 61.77%           |
| OHCA Events                   | 267,999          | 258,961          | 287,712          | 328,745          | 68,745           | 197,933          | 287,028          | 437,284          | 481,142          | 503,154          |
| OHCA Events % (CI 95%)        | 1.12 (1.12-1.13) | 1.00 (1.00-1.01) | 0.95 (0.95-0.96) | 1.10 (1.10-1.10) | 0.87 (0.87-0.88) | 0.88 (0.87-0.88) | 0.84 (0.84-0.84) | 1.01 (1.00-1.01) | 0.98 (0.98-0.99) | 0.95 (0.94-0.95) |

Some variables between Versions 2 and 3 differ, and introversion comparisons should be performed cautiously.



|                                         |                |                |                |                |               |                |                |                |                |                |
|-----------------------------------------|----------------|----------------|----------------|----------------|---------------|----------------|----------------|----------------|----------------|----------------|
| Home/Residence                          | 162,780 (65.0) | 158,240 (65.5) | 178,158 (66.9) | 193,663 (65.3) | 33,661 (63.2) | 107,787 (65.4) | 162,255 (66.3) | 230,434 (67.1) | 247,329 (66.1) | 257,292 (68.8) |
| Healthcare Facility                     | 49,371 (19.7)  | 45,384 (18.8)  | 46,727 (17.6)  | 52,968 (17.9)  | 7,488 (14.1)  | 21,000 (12.7)  | 31,270 (12.8)  | 47,672 (13.9)  | 49,206 (13.1)  | 53,982 (14.2)  |
| Non-Healthcare Business                 | 16,681 (6.7)   | 14,951 (6.2)   | 16,010 (6.0)   | 21,443 (7.2)   | 5,039 (9.5)   | 16,102 (9.8)   | 21,336 (8.7)   | 27,011 (7.9)   | 32,771 (8.8)   | 36,189 (9.7)   |
| Street or Highway                       | 19,095 (7.6)   | 18,602 (7.7)   | 22,235 (8.4)   | 25,090 (8.5)   | 4,398 (8.3)   | 13,650 (8.3)   | 19,994 (8.2)   | 26,977 (7.9)   | 31,690 (8.5)   | 33,683 (9.0)   |
| Other (e.g., sporting events, outdoors) | 2,486 (1.0)    | 4,458 (1.8)    | 3,006 (1.1)    | 3,190 (1.1)    | 2,663 (5.0)   | 6,254 (3.8)    | 9,990 (4.1)    | 11,290 (3.3)   | 13,203 (3.5)   | 13,112 (3.5)   |
| Missing                                 | 17,586         | 17,326         | 21,576         | 32,391         | 15,380        | 32,877         | 41,504         | 92,631         | 102,121        | 106,989        |

The variables for incident location are defined in Version 2 and the International Classification of Diseases-10 codes in

Version 3 and cannot be compared between versions. --- These variables are not available in NEMSIS Version 3 data. No

percentages were used for Ethnicity since Version 3 was not reported consistently as in Version 2.

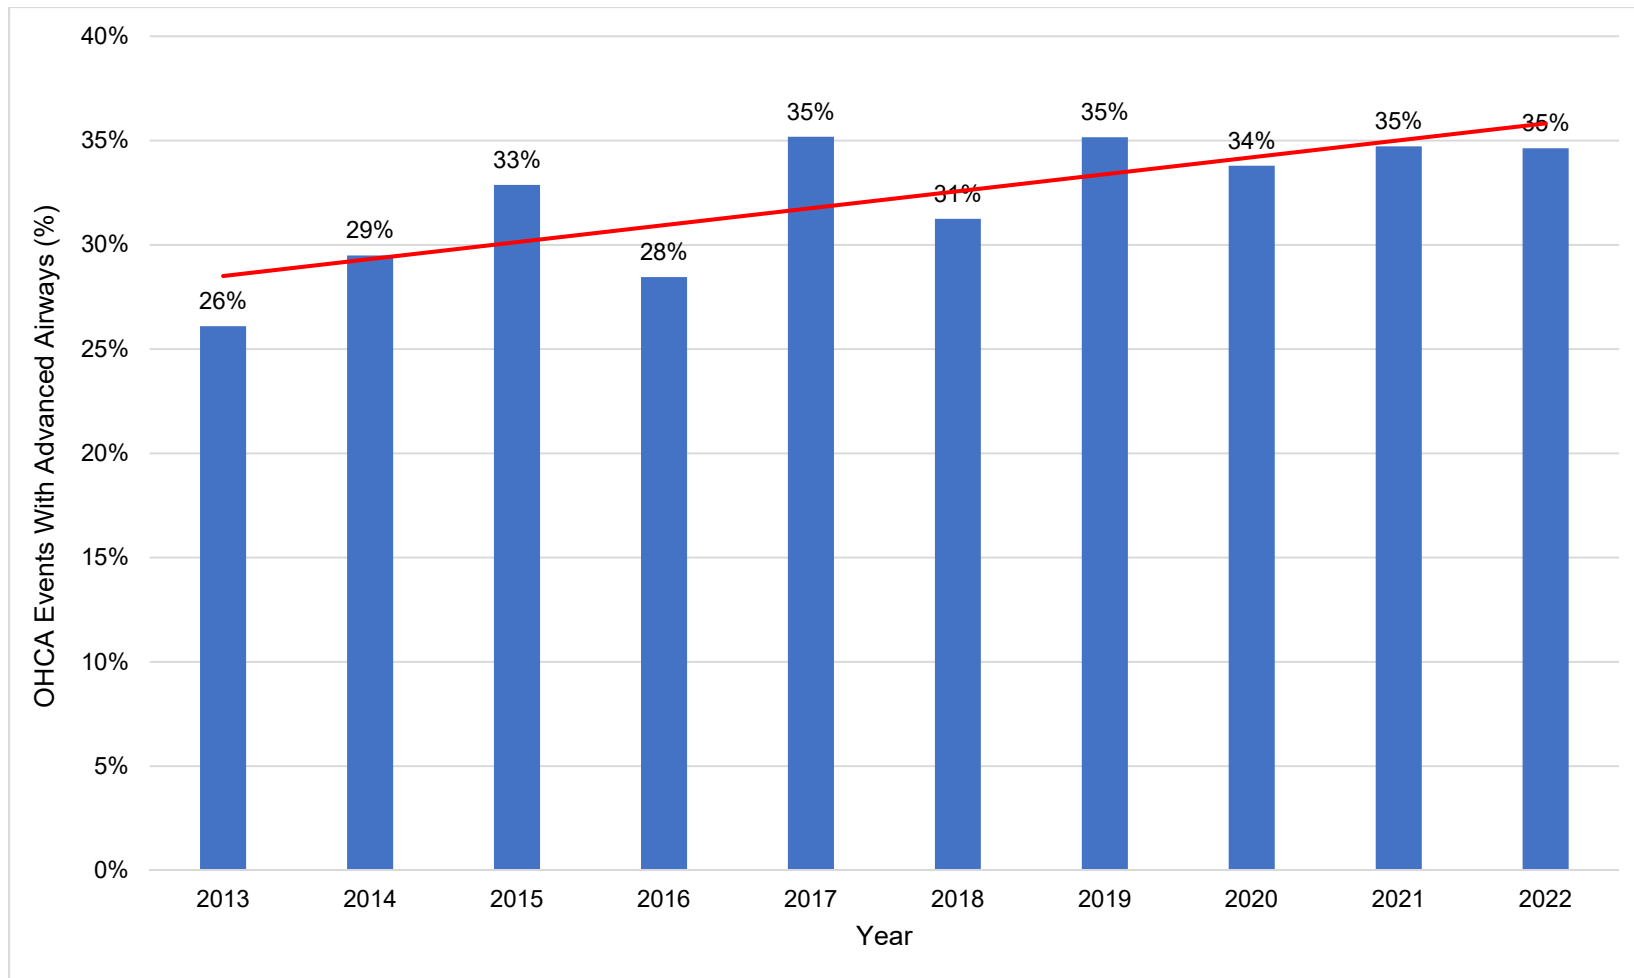

**Figure 2:** Advanced airway proportions per OHCA patient over ten years. Abbreviations: OHCA – out-of-hospital cardiac arrest.

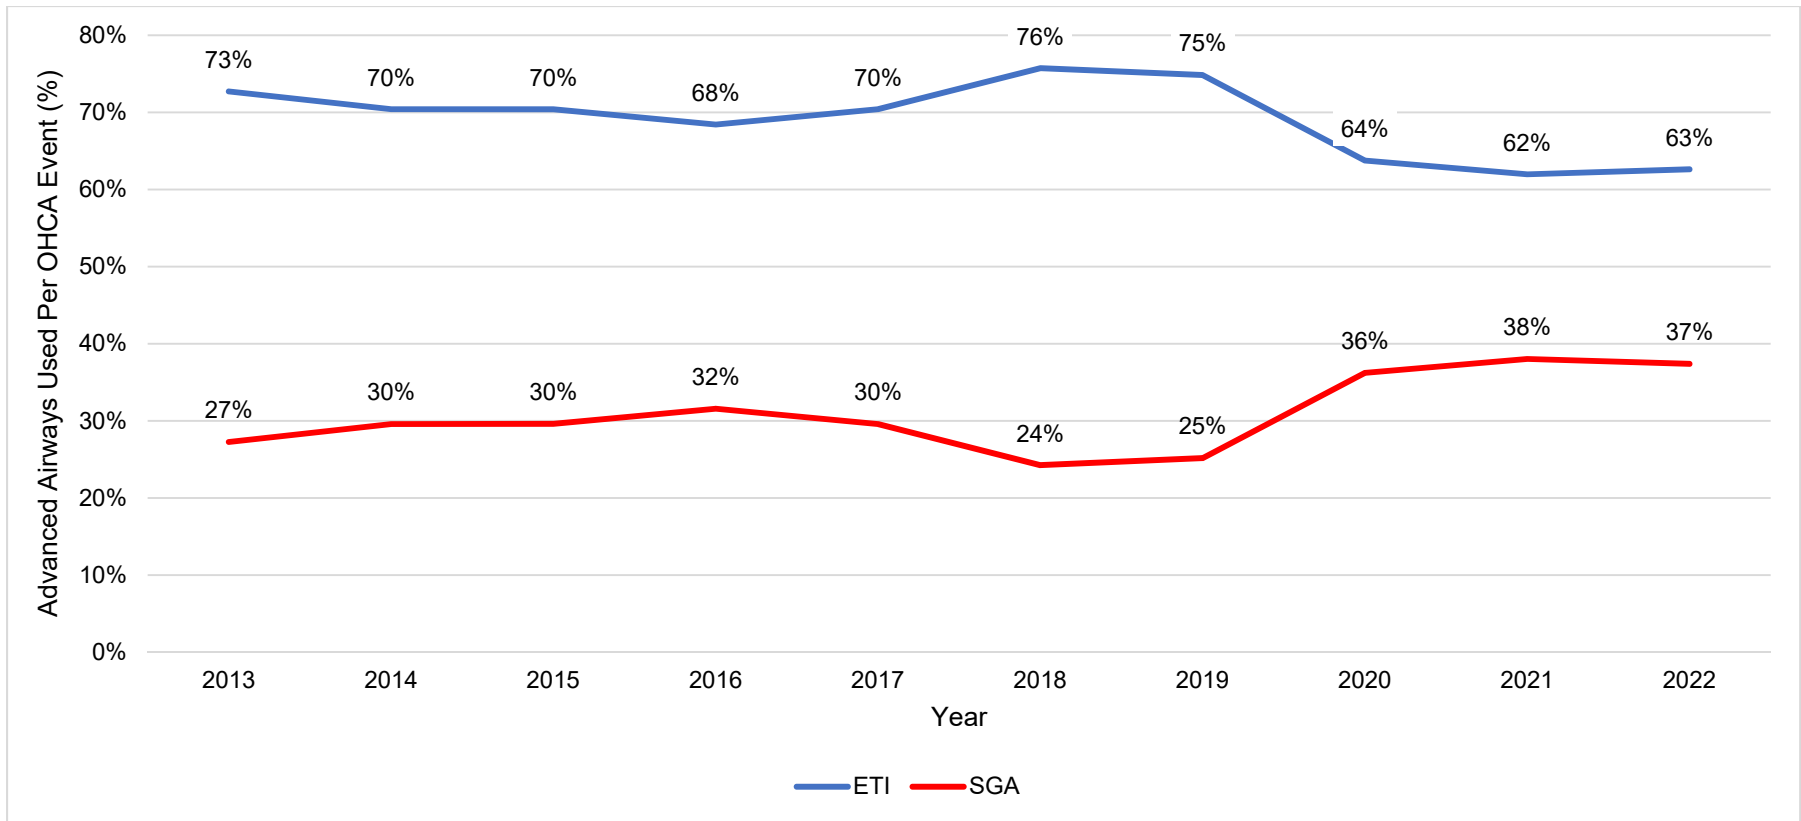

**Figure 3:** Percent of SGA and ETI use per total advanced airway events for OHCA over ten years. Abbreviations: ETI – endotracheal intubation, OHCA – out-of-hospital cardiac arrest, SGA – supraglottic airway.



**Figure 4:** Overall SGA or ETI attempts for OHCA by urbanicity. Abbreviations: ETI – endotracheal intubation, OHCA – out-of-hospital cardiac arrest, SGA – supraglottic airway.
